# Supplementary material for: Efficient and Rapid Removal of Nickel Ions from Electroplating Wastewater Using Micro-/Nanostructured Biogenic Manganese Oxide Composite
Source: MDPI journal article supplement (doi:10.3390/jcs8020063), 2024-02-07
Supplement: s1 [file s1]

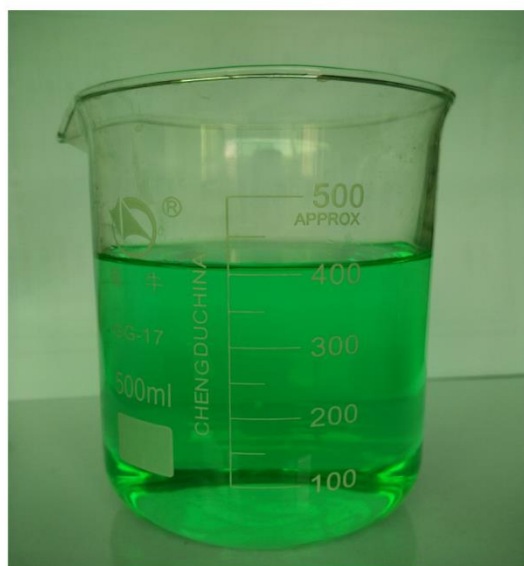

Main components and COD of the electroplating wastewater

| $\text{Ni}^{2+}$ ( $\text{mg L}^{-1}$ ) | pH  | Total P ( $\text{mg L}^{-1}$ ) | COD ( $\text{mg L}^{-1}$ ) |
|-----------------------------------------|-----|--------------------------------|----------------------------|
| 5262.9                                  | 3.0 | 35170.9                        | 30332.2                    |

**Figure S1.** A raw industrial Ni-electroplating wastewater sample of an electroplating plant in Xiamen, Fujian Province, China.

**Table S1.** L9-orthogonal test of Ni<sup>2+</sup> removal efficiency by the BMO composite biosorbent

| Run | Factors          |    |                       |                                             | Removal rate of Ni <sup>2+</sup> (%) |
|-----|------------------|----|-----------------------|---------------------------------------------|--------------------------------------|
|     | Temperature (°C) | pH | Adsorption time (min) | Initial concentration (mg L <sup>-1</sup> ) |                                      |
| 1   | 30               | 4  | 10                    | 10                                          | 84.85                                |
| 2   | 30               | 5  | 30                    | 50                                          | 13.21                                |
| 3   | 30               | 6  | 50                    | 100                                         | 5.60                                 |
| 4   | 40               | 4  | 30                    | 100                                         | 7.73                                 |
| 5   | 40               | 5  | 50                    | 10                                          | 99.61                                |
| 6   | 40               | 6  | 10                    | 50                                          | 20.01                                |
| 7   | 50               | 4  | 50                    | 50                                          | 18.52                                |
| 8   | 50               | 5  | 10                    | 100                                         | 9.18                                 |
| 9   | 50               | 6  | 30                    | 10                                          | 100                                  |

**Table S2.** Analysis of variance for selected factorial model.

| Factors                                       | Squares  | Mean square | df | F value  |
|-----------------------------------------------|----------|-------------|----|----------|
| Temperature                                   | 126.58   | 63.29       | 2  | 7.631    |
| pH                                            | 38.04    | 19.02       | 2  | 2.293    |
| Time                                          | 16.59    | 8.29        | 2  | 1.000    |
| The initial concentration of Ni <sup>2+</sup> | 13736.76 | 6868.38     | 2  | 828.124* |

**Table S3.** Mn (2p<sub>3/2</sub>) peak parameters for *Pseudomonas* sp. MB04B BMO before and after of Ni<sup>2+</sup> removal<sup>a</sup>.

| Peak                                             | B.E<br>(eV) | FWHM (eV) | Percent (%)                          |                                       | Surface species &<br>Comments |
|--------------------------------------------------|-------------|-----------|--------------------------------------|---------------------------------------|-------------------------------|
|                                                  |             |           | BMO                                  | BMO-Ni                                |                               |
| Mn <sup>2+</sup> (2p <sub>3/2</sub> ) parameters |             |           | Mn <sup>2+</sup> (total)=<br>14.73 % | Mn <sup>2+</sup> (total) =<br>30.08 % |                               |
| Mn <sup>2+</sup>                                 | 639.75      | 1.25      | 7.49                                 | 8.36                                  | Mn(II)-O Multiplet #1         |
| Mn <sup>2+</sup>                                 | 640.95      | 1.25      | 0.00                                 | 10.03                                 | Mn(II)-O Multiplet #2         |
| Mn <sup>2+</sup>                                 | 641.75      | 1.25      | 6.04                                 | 1.11                                  | Mn(II)-O Multiplet #3         |
| Mn <sup>2+</sup>                                 | 642.65      | 1.25      | 0.24                                 | 9.19                                  | Mn(II)-O Multiplet #4         |
| Mn <sup>2+</sup>                                 | 644.15      | 1.25      | 0.00                                 | 0.28                                  | Mn(II)-O Multiplet #5         |
| Mn <sup>2+</sup>                                 | 646.40      | 1.25      | 0.97                                 | 1.11                                  | Mn(II)-O Multiplet #6         |

| Mn <sup>3+</sup> (2p <sub>3/2</sub> ) parameters |        |      | Mn <sup>3+</sup> (total) =<br>32.61 % | Mn <sup>3+</sup> (total) =<br>22.84 % |                        |
|--------------------------------------------------|--------|------|---------------------------------------|---------------------------------------|------------------------|
| Mn <sup>3+</sup>                                 | 640.65 | 1.25 | 23.43                                 | 11.98                                 | Mn(III)-O Multiplet #1 |
| Mn <sup>3+</sup>                                 | 641.35 | 1.25 | 8.45                                  | 5.57                                  | Mn(III)-O Multiplet #2 |
| Mn <sup>3+</sup>                                 | 642.16 | 1.25 | 0.72                                  | 0.28                                  | Mn(III)-O Multiplet #3 |
| Mn <sup>3+</sup>                                 | 643.18 | 1.25 | 0.00                                  | 5.01                                  | Mn(III)-O Multiplet #4 |
| Mn <sup>3+</sup>                                 | 644.55 | 1.25 | 0.00                                  | 0.00                                  | Mn(III)-O Multiplet #5 |
| Mn <sup>4+</sup> (2p <sub>3/2</sub> ) parameters |        |      | Mn <sup>4+</sup> (total) =<br>52.66 % | Mn <sup>4+</sup> (total) =<br>47.08 % |                        |
| Mn <sup>4+</sup>                                 | 641.90 | 1.25 | 24.15                                 | 27.86                                 | Mn(IV)-O Multiplet #1  |
| Mn <sup>4+</sup>                                 | 642.92 | 1.25 | 14.73                                 | 5.29                                  | Mn(IV)-O Multiplet #2  |
| Mn <sup>4+</sup>                                 | 643.75 | 1.25 | 7.97                                  | 7.52                                  | Mn(IV)-O Multiplet #3  |
| Mn <sup>4+</sup>                                 | 644.78 | 1.25 | 4.59                                  | 5.01                                  | Mn(IV)-O Multiplet #4  |
| Mn <sup>4+</sup>                                 | 645.80 | 1.25 | 1.21                                  | 1.39                                  | Mn(IV)-O Multiplet #5  |

<sup>a</sup> Abbreviations: B.E., binding energy; FWHM, full width at half maximum; At., atoms.

**Table S4** Ni (2p<sub>3/2</sub>) peak parameters for *Pseudomonas* sp. MB04B BMO after Ni<sup>2+</sup> removal <sup>a</sup>.

| Peak                                             | B.E<br>(eV) | FWHM (eV)                         | Percent (%) | Surface species & Comments |
|--------------------------------------------------|-------------|-----------------------------------|-------------|----------------------------|
| Ni <sup>2+</sup> (2p <sub>3/2</sub> ) parameters |             | Ni <sup>2+</sup> (Total) = 95.61% |             |                            |
| Ni <sup>2+</sup>                                 | 853.60      | 1.25                              | 33.78       | Ni(II)-O Multiplet #1      |
| Ni <sup>2+</sup>                                 | 854.40      | 1.25                              | 14.53       | Ni(II)-O Multiplet #2      |
| Ni <sup>2+</sup>                                 | 855.50      | 1.25                              | 13.18       | Ni(II)-O Multiplet #3      |
| Ni <sup>2+</sup>                                 | 856.00      | 1.25                              | 18.24       | Ni (II)-O Multiplet #4     |
| Ni <sup>2+</sup>                                 | 857.20      | 1.25                              | 15.20       | Ni (II)-O Multiplet #5     |
| Ni <sup>2+</sup>                                 | 855.60      | 1.25                              | 0.68        | Ni (II)-O Multiplet #6     |
| Ni <sup>3+</sup> (2p <sub>3/2</sub> ) parameters |             | Ni <sup>3+</sup> (Total) = 4.39%  |             |                            |
| Ni <sup>3+</sup>                                 | 855.8       | 1.25                              | 0.67        | Ni(III)-O Multiplet #1     |
| Ni <sup>3+</sup>                                 | 855.60      | 1.25                              | 0.34        | Ni(III)-O Multiplet #2     |
| Ni <sup>3+</sup>                                 | 852.90      | 1.25                              | 3.04        | Ni(III)-O Multiplet #3     |
| Ni <sup>3+</sup>                                 | 855.4       | 1.25                              | 0.00        | Ni (III)-O Multiplet #4    |
| Ni <sup>3+</sup>                                 | 856.00      | 1.25                              | 0.34        | Ni (III)-O Multiplet #5    |

<sup>a</sup> Abbreviations: B.E., binding energy; FWHM, full width at half maximum; At., atoms.
